# Supplementary material for: Cell density and airspace patterning in the leaf can be manipulated to increase leaf photosynthetic capacity
Source: PubMed Central journal article supplement (PMC5725688; doi:10.1111/tpj.13727), 2017-11-15
Supplement: TPJ-92-981-s001.pdf [file TPJ-92-981-s001.pdf]

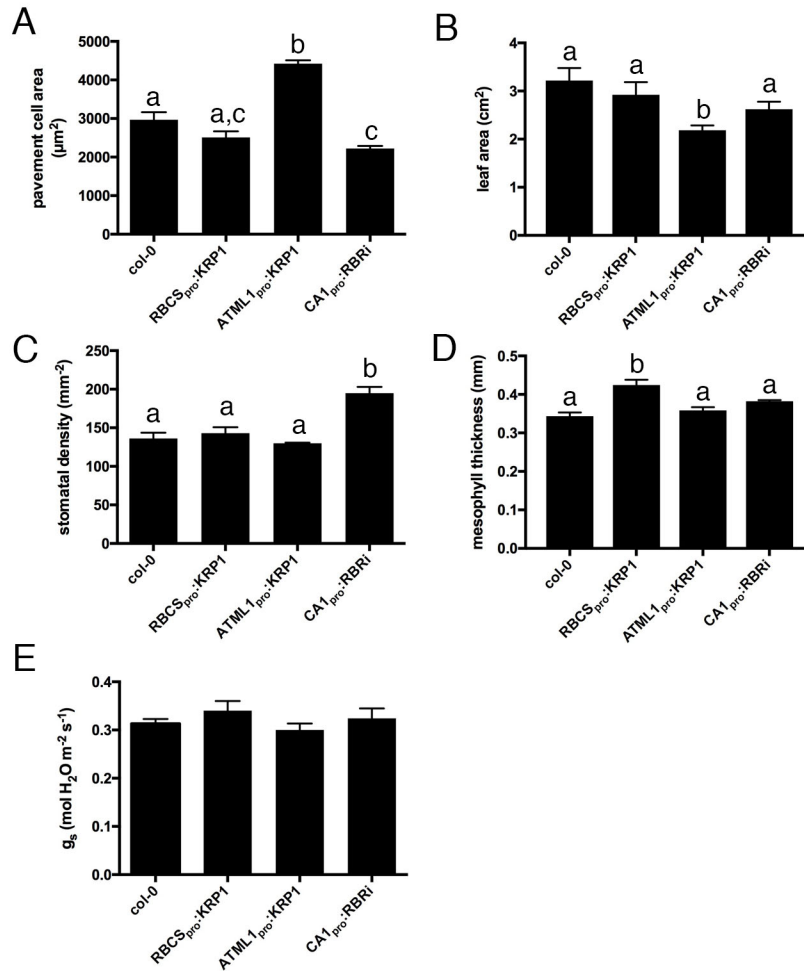

**Sup Fig. 1**

**Epidermal cell size, stomatal density and stomatal conductance**

(A) Upper epidermal pavement cell area (B) area of leaf 8 at maturity (C) stomatal density in upper epidermis (D) mesophyll thickness and (E) stomatal conductance,  $g_s$ , in *Col-0*, RBCS<sub>pro</sub>:KRP1, ATML1<sub>pro</sub>:KRP1 and CA1<sub>pro</sub>:RBRI leaves, as indicated. Values are means, error bars = sem. Values were measured in leaves from at least four (B) or at least five (A,C,D,E) independent plants. Samples were compared with ANOVA followed by a post-hoc Tukey test. Columns indicated by identical letters within each analysis cannot be distinguished from each other at the 0.05 confidence limit.
