# Supplementary material for: Cell density and airspace patterning in the leaf can be manipulated to increase leaf photosynthetic capacity
Source: PubMed Central journal article supplement (PMC5725688; doi:10.1111/tpj.13727), 2017-11-15
Supplement: TPJ-92-981-s002.pdf [file TPJ-92-981-s002.pdf]

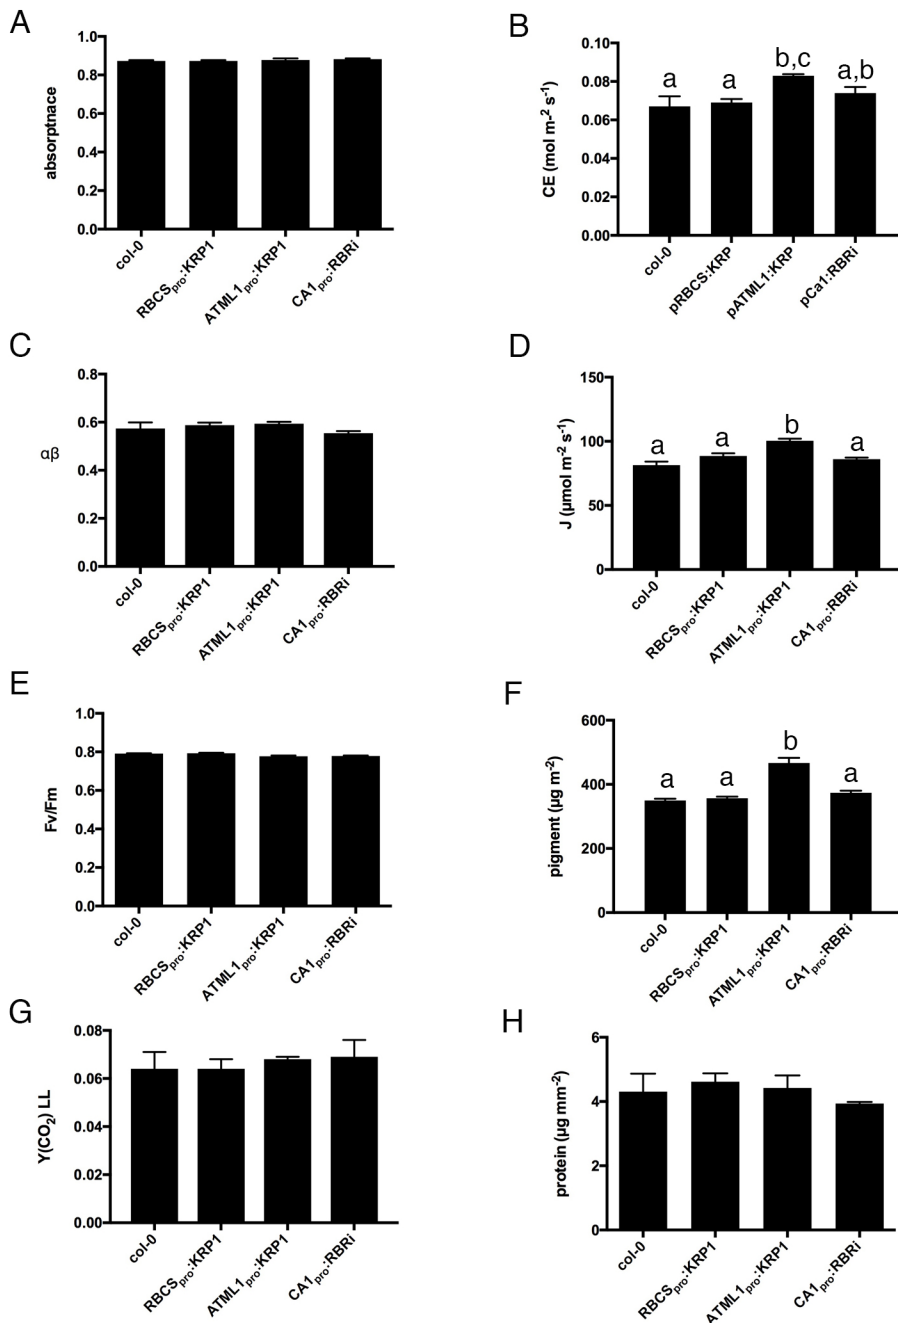

## Sup Fig 2

### Analysis of light absorption and photosystem efficiency

(A) Light absorbance (B) carboxylation efficiency,  $CE$  (C) the fraction of  $PPFD$  harvested by PSII,  $\alpha\beta$  (D) electron transport rate,  $J_{400}$  (E) the maximum efficiency of photosystem II,  $F_v/F_m$  (F) the total pigments per area (G) initial/maximum quantum yield for  $\text{CO}_2$  fixation,  $Y(\text{CO}_2)_{LL}$  and (H) total protein concentration per area in *Col-0*, *RBCS<sub>pro</sub>:KRP1*, *ATML1<sub>pro</sub>:KRP1* and *CA1<sub>pro</sub>:RBRi* leaves, as indicated. Values are means, error bars = SEM. For A, B, D, F, G  $n \geq 3$ ; C  $\geq 5$ ; E  $\geq 6$ . Samples were compared with ANOVA, followed by a post-hoc Tukey test. Columns indicated by identical letters within each analysis cannot be distinguished from each other at the 0.05 confidence limit.
