# Supplementary material for: Cell density and airspace patterning in the leaf can be manipulated to increase leaf photosynthetic capacity
Source: PubMed Central journal article supplement (PMC5725688; doi:10.1111/tpj.13727), 2017-11-15
Supplement: TPJ-92-981-s003.pdf [file TPJ-92-981-s003.pdf]

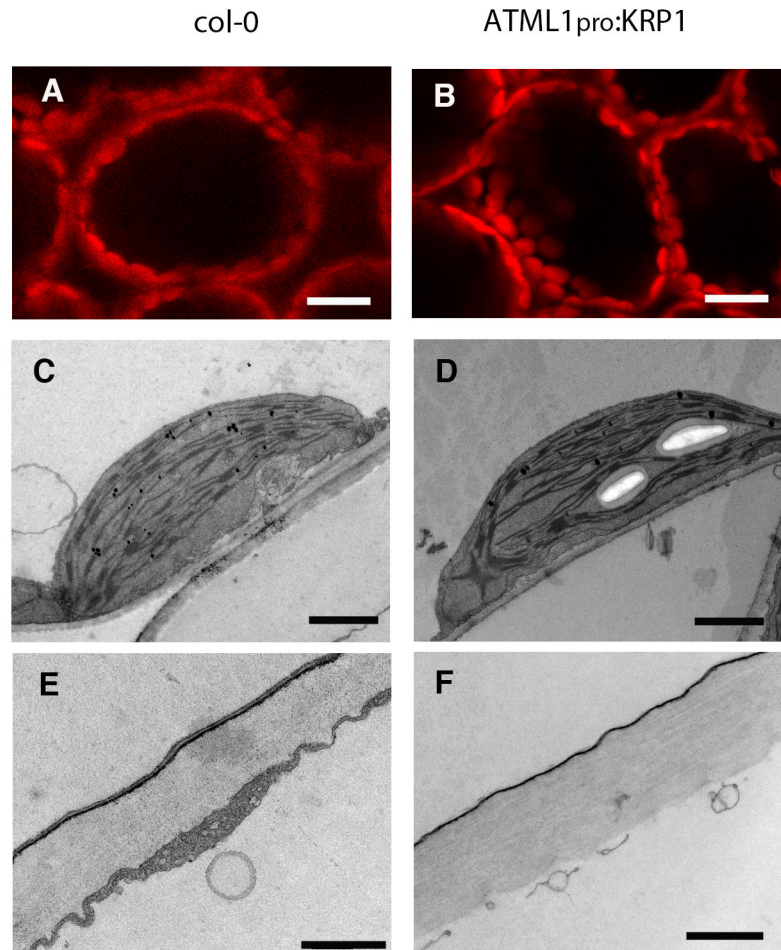

**Sup Fig. 3**

**Analysis of chloroplast and cell structure**

**(A,B)** Confocal images of palisade cells in (A) col-0 and (B) *ATML1pro:KRP1* leaves revealing chlorophyll autofluorescence in plastids (red).

**(C,D)** TEM images of a chloroplast from a palisade cell in (C) col-0 and (D) *ATML1pro:KRP1*.

**(E,F)** TEM images of cell wall from a palisade cell in (E) col-0 and (F) *ATML1pro:KRP1*.

Scale bar: A,B = 50  $\mu$ m; C,D = 2  $\mu$ m; E,F = 0.5  $\mu$ m
