# Supplementary material for: Cell density and airspace patterning in the leaf can be manipulated to increase leaf photosynthetic capacity
Source: PubMed Central journal article supplement (PMC5725688; doi:10.1111/tpj.13727), 2017-11-15
Supplement: TPJ-92-981-s004.pdf [file TPJ-92-981-s004.pdf]

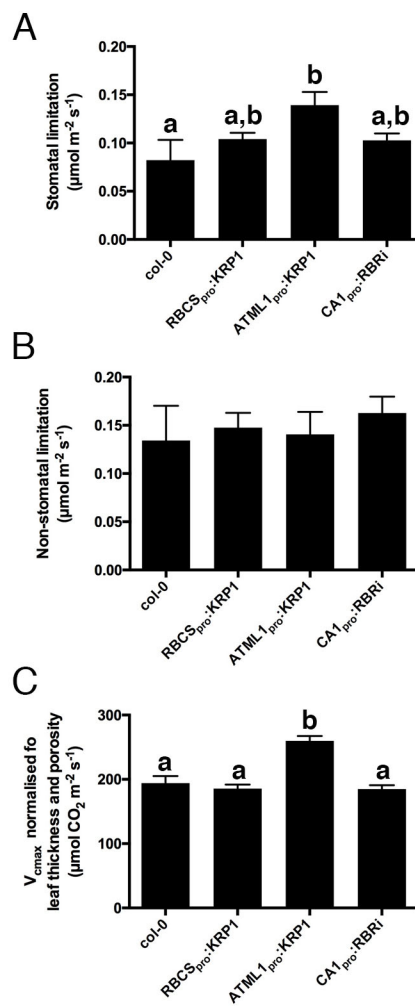

**Sup Fig. 4**

**Analysis of stomatal and non-stomatal limitation**

**(A)** Stomatal limitation **(B)** non-stomatal limitation and **(C)**  $V_{\text{cmax}}$  normalized for leaf thickness and porosity in col-0, RBCS<sub>pro</sub>:KRP1, ATML1<sub>pro</sub>:KRP1 and CA1<sub>pro</sub>:RBRi leaves, as indicated. Values are means, error bars = sem.  $n > 6$ . Samples were compared with ANOVA followed by a post-hoc Tukey test. Columns indicated by identical letters within each analysis cannot be distinguished from each other at the 0.05 confidence limit.
