# Supplementary material for: Cell density and airspace patterning in the leaf can be manipulated to increase leaf photosynthetic capacity
Source: PubMed Central journal article supplement (PMC5725688; doi:10.1111/tpj.13727), 2017-11-15
Supplement: TPJ-92-981-s005.pdf [file TPJ-92-981-s005.pdf]

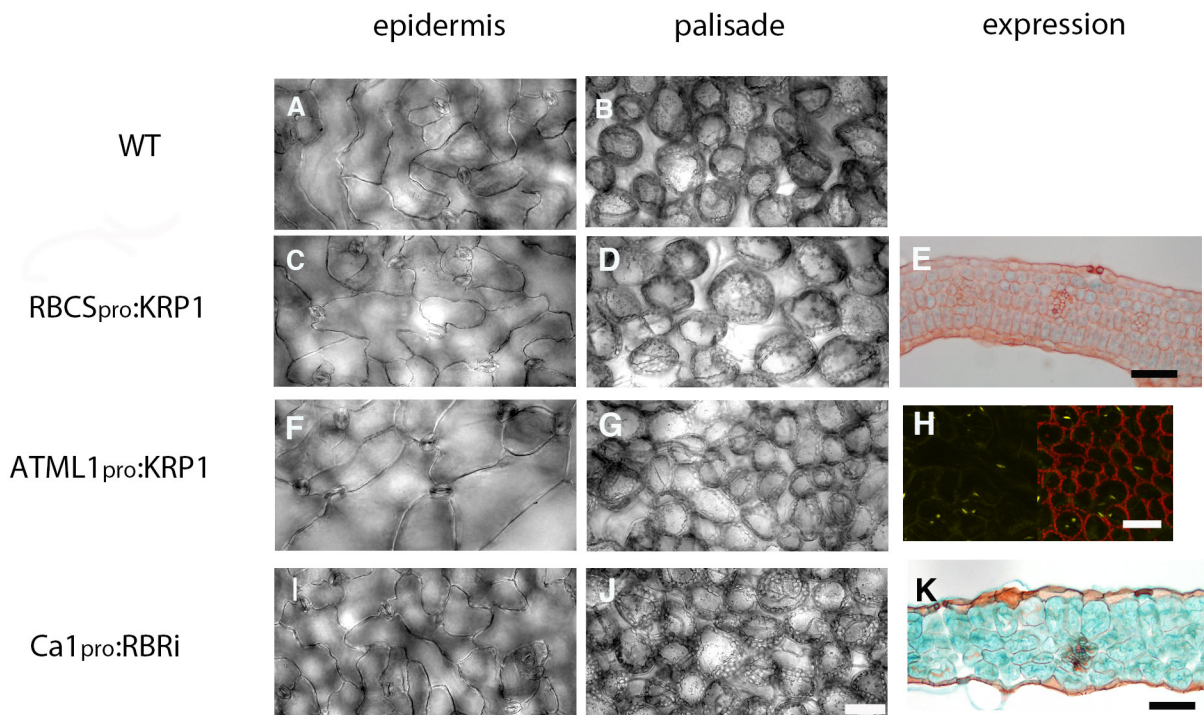

### Sup Fig 5

#### Generation and characterisation of Arabidopsis genotypes

**(A,C,F,I)** DIC images of the upper epidermis of col-0, RBCS<sub>pro</sub>:KRP1, ATML:KRP1 and CA1<sub>pro</sub>:RBRI leaves.

**(B,D,G,J)** DIC images of the palisade of col-0, RBCS<sub>pro</sub>:KRP1, ATML:KRP1 and CA1<sub>pro</sub>:RBRI leaves.

**(E)** Cross-section through an RBCS<sub>pro</sub>:KRP1 leaf showing GUS signal (blue) in the mesophyll (counterstained with saffranin O).

**(H)** Confocal analysis of a ATML1<sub>pro</sub>:KRP1 leaf showing YFP signal (yellow) in the epidermal plane (left hand panel) and combined YFP (epidermis) and chlorophyll autofluorescence (red) in palisade cells (right hand panel).

**(K)** Cross-section through a CA1<sub>pro</sub>:RBRI leaf showing GUS signal (blue) in the mesophyll and limited signal in the epidermis (counterstained with saffranin O).

Scale bars = 50  $\mu$ m except for E, H, K = 100  $\mu$ m.
